# Supplementary material
Source: Springer Nature journal article supplement (https://www.springermedizin.de/resource/supplementary/12985_2008_509_MOESM10_ESM.pdf/9607908)
Supplement: MOESM10 [file 9607908]

| Gene                                    | HXB2 coordinates | Sequence Logo and degeneracy                                                        | Function                                             |
|-----------------------------------------|------------------|-------------------------------------------------------------------------------------|------------------------------------------------------|
| <b>Regions with predicted functions</b> |                  |                                                                                     |                                                      |
| <i>gag</i><br>Figure 3a<br>'INS1'       | 898 - 903        |    | Within (INS1)<br>first Inhibitory<br>sequence region |
| Figure3a<br>'INS1'                      | 985 - 996        |    | Within INS1                                          |
| Figure 3a<br>'INS2'                     | 1309 - 1314      |    | Within INS2                                          |
| <i>pol</i><br>Figure 3b<br>'p1'         | 4764 - 4776      |    | Within nuclease-<br>hypersensitive<br>region         |
| Figure<br>3b: 'p1'                      | 4777 - 4790      |    | potential binding<br>motif for Oct-1                 |
| Figure 3b<br>'p2'                       | 4864 - 4866      |    | In nuclease-<br>hypersensitive<br>region             |
| <b>Novel regions</b>                    |                  |                                                                                     |                                                      |
| <i>vpu</i><br>Figure 4b<br>'n2'         | 6101 - 6106      |  | novel conserved<br>region                            |
| Figure 34b<br>'n3'                      | 6143 - 6151      |  | novel conserved<br>region                            |
| Figure 3b<br>'n4'                       | 6167 - 6178      |  | novel conserved<br>region                            |
| <i>env</i><br>Figure 4c<br>'n1'         | 7656 - 7667      |  | novel region,<br>analyzed in fitness<br>assays       |
